# Supplementary material for: Population-Based Estimates for the Prevalence of Multiple Sclerosis in the United States by Race, Ethnicity, Age, Sex, and Geographic Region
Source: PubMed Central journal article supplement (PMC10186207; doi:10.1001/jamaneurol.2023.1135), 2023-05-15
Supplement: jamaneurol-e231135-s001.pdf [file jamaneurol-e231135-s001.pdf]

## Supplemental Online Content

Hittle M, Culpepper WJ, Langer-Gould A, et al. Population-based estimates for the prevalence of multiple sclerosis in the United States by race, ethnicity, age, sex, and geographic region. *JAMA Neurol*. Published online May 15, 2023. doi:10.1001/jamaneurol.2023.1135

### eMethods

### eReferences

**eTable 1.** Race and Ethnicity Categories for Datasets Used in US MS Prevalence Estimates

**eTable 2.** 2010 MS Prevalence per 100,000 Adults in the US, Cumulated over 10 Years by Race, Ethnicity and US Census Region

**eTable 3.** 2010 MS Prevalence per 100,000 Adults in the US, Cumulated over 10 Years, for the Optum Dataset

**eTable 4.** 2010 MS Prevalence per 100,000 Adults in the US, Cumulated over 10 Years, for the Department of Veterans Affairs Dataset

**eTable 5.** 2010 MS Prevalence per 100,000 Adults in the US, Cumulated over 10 Years, for the Medicaid Dataset

**eTable 6.** 2010 MS Prevalence per 100,000 Adults in the US, Cumulated over 10 Years, for the Medicare Dataset

This supplemental material has been provided by the authors to give readers additional information about their work.

## **eMethods**

### *Private insurance*

In 2010, two-thirds of Americans had private health care coverage.<sup>1, 2</sup> Since the AHC datasets available for the private insurance sector vary in terms of geographic coverage and the types of providers represented, we accessed Optum's de-identified Clinformatics® Data Mart Database (CDM) to represent the private insurance sector because of their nationwide coverage.<sup>3</sup> The age and sex-based prevalence estimates for persons with MS (PwMS) were similar between CDM and Truven Health in our initial prevalence report,<sup>4</sup> therefore we were confident that CDM adequately represented MS prevalence for the privately insured. For CDM AHC, we note that when race and/or ethnicity were not available in the data from health providers, proprietary algorithms are used which rely on the policyholder's zip code, first, middle and last names, public records and self-reported surveys.<sup>5</sup>

### *Public insurance*

Low-income adults and those with particular disabilities may obtain health care coverage through government-funded Medicaid plans. In 2010, 93% of US adults  $\geq 65$  were enrolled in government-funded Medicare.<sup>6</sup> In the public sector, the Centers for Medicare & Medicaid Services datasets captured all eligible persons (100%) enrolled in Medicare or Medicaid across the US (>50 million individuals).<sup>7</sup> To assess the military sector, we used the Department of Veterans Affairs (VA) database, which included all persons enrolled in the VA health care system. Collectively, these datasets provided health care information for >125 million persons in the US in 2010.

### *Diagnostic algorithm for MS*

As described elsewhere,<sup>8</sup> we developed and tested several algorithms to identify people with MS using AHC datasets compared with physician-adjudicated MS cases as the reference standard. The data in the AHC datasets included all health care encounters in the inpatient and outpatient settings as well as prescription drug claims. For prescription drug claims, we considered only disease-modifying therapies approved by the US Food and Drug Administration for MS by 2010, including the interferon betas, glatiramer acetate, natalizumab, and fingolimod.<sup>9</sup> To avoid misclassification, claims for natalizumab were not included if the individual also had an ICD-9 code for inflammatory bowel disease, another disorder for which this medication is approved. The optimal algorithm in terms of sensitivity, specificity, and simplicity required the accumulation of  $\geq 3$  MS-related hospitalizations, outpatient visits, or prescription release encounters for an MS disease-modifying therapy in any combination within a 1-year period. When tested among individuals with at least 1 MS claim, the sensitivity of the MS algorithm was 86-92% and the specificity was 66-83%, depending on the dataset.<sup>7</sup> When tested in a Canadian population that included individuals with and without any MS claims (i.e., general population), the sensitivity was 96.0% and the specificity was 99.5%.<sup>8</sup>

### *Latitude Band and State Aggregation*

Data from the CDM dataset were also aggregated by latitudinal band, with each band consisting of the entire space within the contiguous US existing between each major degree of latitude. Twenty-four latitudinal bands were used to clearly depict the north-south gradient. State latitude was defined as the latitudinal moment at which half of the population of the state in 2010 resided above and below.

## eReferences

1. Health Insurance in the United States: 2010-2017. Current Population Survey <https://www.census.gov/data/tables/time-series/demo/health-insurance/historical-series/hic.html>. Accessed January 22, 2023.
2. Nelson LM, Wallin MT, Marrie RA, et al. A new way to estimate neurologic disease prevalence in the United States: illustrated with MS. *Neurology*. 2019;92:469–480.
3. Stanford Center for Population Health Sciences. Optum’s de-identified Clinformatics® Data Mart Database. 2021. Redivis. (Dataset) <https://doi.org/10.57761/phra-vp46> (accessed January 22, 2023).
4. Wallin MT, Culpepper WJ, Campbell D, et al. The prevalence of MS in the United States: A population-based estimate using health claims data. *Neurology*. 2019;92:e1029-e1040.
5. Heun-Johnson H, Menchine M, Axeen S, Lung K, et al. Association Between Race/Ethnicity and Disparities in Health Care Use Before First-Episode Psychosis Among Privately Insured Young Patients. *JAMA Psychiatry*. 2021;89:311-319.
6. West LA, Cole S, Goodkind D, He W. Current Population Reports: 65+ in the United States: 2010. US Census Bureau, June 2014.
7. Leonard CE, Brensinger CM, Nam YH, et al. The quality of Medicaid and Medicare data obtained from CMS and its contractors: implications for pharmacoepidemiology. *BMC Health Serv Res*. 2017;17:304–311.
8. Culpepper WJ, Marrie RA, Langer-Gould A, et al. Validation of a Standardized Algorithm for Identifying MS Cases across Claims Datasets. *Neurology*. 2019;92:e1016–e1028.
9. Reich D, Lucchinetti CF, Calabresi PA. Multiple sclerosis. *N Engl J Med*. 2018;378: 169–180.

**eTable 1.** Race and Ethnicity Categories for Datasets Used in US MS Prevalence Estimates

| Dataset  | Race and Ethnicity Categories |       |                                              |                                         |                   |       |                                         |                                    |
|----------|-------------------------------|-------|----------------------------------------------|-----------------------------------------|-------------------|-------|-----------------------------------------|------------------------------------|
|          | White                         | Black | Asian/Pac<br>Islander/<br>Native<br>Hawaiian | Native<br>American/<br>Alaska<br>Native | Multiple<br>Races | Other | Unknown/<br>Missing/<br>Not<br>Reported | Hispanic<br>Ethnicity <sup>a</sup> |
| Optum    | X                             | X     | X                                            | -                                       | -                 | -     | X                                       | X <sup>a</sup>                     |
| VA       | X                             | X     | X                                            | X                                       | -                 | X     | X                                       | X <sup>a</sup>                     |
| Medicaid | X                             | X     | X                                            | X                                       | X                 | -     | -                                       | X <sup>a</sup>                     |
| Medicare | X                             | X     | X                                            | X                                       | X                 | -     | -                                       | X <sup>a</sup>                     |

<sup>a</sup>Hispanic is an ethnicity category separate from race in the VA dataset. Hispanic is classified as a race category for the

Optum, Medicaid, and Medicare datasets.

**eTable 2.** 2010 MS Prevalence per 100,000 Adults in the US, Cumulated over 10 Years by Race, Ethnicity and US Census Region

|                    | United States Census Region |                          |             |                          |           |                          |           |                          |
|--------------------|-----------------------------|--------------------------|-------------|--------------------------|-----------|--------------------------|-----------|--------------------------|
|                    | Northeast (1)               |                          | Midwest (2) |                          | South (3) |                          | West (4)  |                          |
| Race and Ethnicity | No. Cases                   | 2010 Prevalence (95% CI) | No. Cases   | 2010 Prevalence (95% CI) | No. Cases | 2010 Prevalence (95% CI) | No. Cases | 2010 Prevalence (95% CI) |
| Non-Hispanic White | 131,738                     | 439.0<br>(436.7-441.4)   | 159,386     | 396.7<br>(394.7-398.6)   | 169,410   | 315.4<br>(313.9-316.9)   | 117,191   | 387.5<br>(385.3-389.8)   |
| Non-Hispanic Black | 13,313                      | 298.5<br>(293.5-303.6)   | 17,952      | 374.9<br>(369.4-380.3)   | 41,068    | 268.9<br>(266.3-271.5)   | 7,943     | 333.7<br>(326.4-341.1)   |
| Hispanic           | 10,102                      | 208.5<br>(204.5-212.6)   | 4,735       | 166.0<br>(161.3-170.7)   | 20,370    | 168.2<br>(165.9-170.5)   | 18,248    | 136.6<br>(134.6-138.6)   |
| Other              | 5,859                       | 188.5<br>(183.6-193.3)   | 5,008       | 233.5<br>(227.1-240.0)   | 8,623     | 209.0<br>(204.6-213.4)   | 13,833    | 185.1<br>(182.0-188.2)   |

Abbreviation: CI: Confidence interval

**eTable 3.** 2010 MS Prevalence per 100,000 Adults in the US, Cumulated over 10 Years, for the Optum Dataset

|                         | Non-Hispanic White |                          | Non-Hispanic-Black |                          | Hispanic     |                          | Other <sup>a</sup> |                          | Total                    |
|-------------------------|--------------------|--------------------------|--------------------|--------------------------|--------------|--------------------------|--------------------|--------------------------|--------------------------|
| Sex & Age (yrs.) groups | No. of Cases       | 2010 Prevalence (95% CI) | No. of Cases       | 2010 Prevalence (95% CI) | No. of Cases | 2010 Prevalence (95% CI) | No. of Cases       | 2010 Prevalence (95% CI) | 2010 Prevalence (95% CI) |
| Female                  | 289,867            | 531.7<br>(529.8-533.6)   | 34,331             | 400.4<br>(396.1-404.6)   | 28,310       | 259.0<br>(256.0-262.0)   | 20,729             | 315.6<br>(311.3-319.8)   | 163.1<br>(461.6-464.6)   |
| Male                    | 90,555             | 167.7<br>(166.6-168.8)   | 9,680              | 121.0<br>(118.6-123.4)   | 9,943        | 79.7<br>(78.1-81.2)      | 5,532              | 91.4<br>(89.0-93.8)      | 143.7<br>(142.8-144.5)   |
| 18-35                   | 52,439             | 146.4<br>(145.2-147.7)   | 9,861              | 152.8<br>(149.7-155.8)   | 11,722       | 106.6<br>(104.7-108.6)   | 6,687              | 103.8<br>(101.1-106.5)   | 135.8<br>(134.8-136.7)   |
| 35-44                   | 91,388             | 410.6<br>(408.0-413.3)   | 11,546             | 302.6<br>(297.1-308.1)   | 11,436       | 196.3<br>(192.7-199.1)   | 6,687              | 223.8<br>(218.5-229.2)   | 347.0<br>(345.1-349.0)   |
| 45-54                   | 130,535            | 476.9<br>(474.3-479.5)   | 14,195             | 370.0<br>(363.9-376.0)   | 9,847        | 228.5<br>(224.0-233.0)   | 8,449              | 337.0<br>(311.1-344.2)   | 428.7<br>(426.7-430.8)   |
| 55-64                   | 104,299            | 464.2<br>(461.4-467.0)   | 8,171              | 345.1<br>(337.7-352.6)   | 5,123        | 233.3<br>(226.9-239.6)   | 5,336              | 319.7<br>(311.1-328.3)   | 428.3<br>(425.9-430.7)   |
| ≥ 65                    | 1,762              | 283.4<br>(270.2-296.6)   | 238                | 240.5<br>(210.0-271.0)   | 125          | 138.7<br>(114.4-162.9)   | 218                | 245.3<br>(212.8-277.9)   | 260.4<br>(249.9-270.9)   |
| Total                   | 380,422            | 350.5<br>(349.4-351.6)   | 44,011             | 265.5<br>(263.1-268.0)   | 38,253       | 163.4<br>(161.7-165.0)   | 25,261             | 208.1<br>(205.6-210.6)   | 303.4<br>(302.6-304.3)   |

<sup>a</sup> “Other” category includes Asians, Native Americans, Native Hawaiians, Pacific Islanders, and multiple races

**eTable 4.** 2010 MS Prevalence per 100,000 Adults in the US, Cumulated over 10 Years, for the Department of Veterans Affairs Dataset

| Sex & Age (yrs.) groups | Non-Hispanic White |                          | Non-Hispanic Black |                          | Hispanic     |                          | Other <sup>a</sup> |                          | Total                    |
|-------------------------|--------------------|--------------------------|--------------------|--------------------------|--------------|--------------------------|--------------------|--------------------------|--------------------------|
|                         | No. of Cases       | 2010 Prevalence (95% CI) | No. of Cases       | 2010 Prevalence (95% CI) | No. of Cases | 2010 Prevalence (95% CI) | No. of Cases       | 2010 Prevalence (95% CI) | 2010 Prevalence (95% CI) |
| Female                  | 4,227              | 756.5<br>(733.8-779.3)   | 1,229              | 587.7<br>(554.9-620.4)   | 286          | 309.9<br>(274.0-345.8)   | 191                | 148.6<br>(127.5-169.7)   | 600.3<br>(585.0-615.5)   |
| Male                    | 6,211              | 270.9<br>(264.2-277.6)   | 1,120              | 180.5<br>(170.0-191.1)   | 461          | 131.6<br>(119.6-143.6)   | 227                | 71.6<br>(62.3-80.9)      | 224.0<br>(219.1-228.9)   |
| 18-35                   | 564                | 120.2<br>(110.3-130.1)   | 331                | 241.2<br>(215.2-130.1)   | 167          | 110.1<br>(93.4-126.8)    | 32                 | 28.1<br>(18.4-37.8)      | 125.5<br>(118.1-132.9)   |
| 35-44                   | 1,458              | 382.8<br>(363.2-402.4)   | 494                | 356.5<br>(325.1-387.9)   | 167          | 199.2<br>(169.0-229.4)   | 58                 | 82.0<br>(60.8-103.1)     | 323.1<br>(309.6-336.7)   |
| 45-54                   | 3190               | 499.2<br>(481.9-297.6)   | 858                | 318.9<br>(297.6-340.3)   | 214.6        | 255.5<br>(221.3-289.6)   | 150                | 136.3<br>(114.5-158.1)   | 400.4<br>(388.6-412.2)   |
| 55-64                   | 5,226              | 383.6<br>(373.3-394.0)   | 667                | 233.9<br>(216.2-251.7)   | 198          | 160.9<br>(138.6-188.3)   | 179                | 117.6<br>(100.4-134.8)   | 326.2<br>(318.1-334.2)   |
| Total                   | 10,438             | 366.1<br>(359.-373.1)    | 2,350              | 283.2<br>(271.7-294.6)   | 747          | 168.8<br>(156.7-180.9)   | 418                | 93.8<br>(84.8-102.8)     | 305.4<br>(300.3-310.4)   |

<sup>a</sup> “Other” category includes Asians, Native Americans, Native Hawaiians, Pacific Islanders, and multiple races.



**eTable 5.** 2010 MS Prevalence per 100,000 Adults in the US, Cumulated over 10 Years, for the Medicaid Dataset

| Sex & Age (yrs.) groups | Non-Hispanic White |                          | Non-Hispanic Black |                          | Hispanic     |                          | Other <sup>a</sup> |                          | Total                    |
|-------------------------|--------------------|--------------------------|--------------------|--------------------------|--------------|--------------------------|--------------------|--------------------------|--------------------------|
|                         | No. of Cases       | 2010 Prevalence (95% CI) | No. of Cases       | 2010 Prevalence (95% CI) | No. of Cases | 2010 Prevalence (95% CI) | No. of Cases       | 2010 Prevalence (95% CI) | 2010 Prevalence (95% CI) |
| Female                  | 289,867            | 531.7 (529.8-533.6)      | 34,331             | 400.4 (396.1-404.6)      | 28,310       | 259.0 (256.0-262.0)      | 20,729             | 315.6 (311.3-319.8)      | 163.1 (461.6-464.6)      |
| Male                    | 90,555             | 167.7 (166.6-168.8)      | 9,680              | 121.0 (118.6-123.4)      | 9,943        | 79.7 (78.1-81.2)         | 5,532              | 91.4 (89.0-93.8)         | 143.7 (142.8-144.5)      |
| 18-35                   | 52,439             | 146.4 (145.2-147.7)      | 9,861              | 152.8 (149.7-155.8)      | 11,722       | 106.6 (104.7-108.6)      | 6,687              | 103.8 (101.1-106.5)      | 135.8 (134.8-136.7)      |
| 35-44                   | 91,388             | 410.6 (408.0-413.3)      | 11,546             | 302.6 (297.1-308.1)      | 11,436       | 196.3 (192.7-199.1)      | 6,687              | 223.8 (218.5-229.2)      | 347.0 (345.1-349.0)      |
| 45-54                   | 130,535            | 476.9 (474.3-479.5)      | 14,195             | 370.0 (363.9-376.0)      | 9,847        | 228.5 (224.0-233.0)      | 8,449              | 337.0 (311.1-344.2)      | 428.7 (426.7-430.8)      |
| 55-64                   | 104,299            | 464.2 (461.4-467.0)      | 8,171              | 345.1 (337.7-352.6)      | 5,123        | 233.3 (226.9-239.6)      | 5,336              | 319.7 (311.1-328.3)      | 428.3 (425.9-430.7)      |
| ≥ 65                    | 1,762              | 283.4 (270.2-296.6)      | 238                | 240.5 (210.0-271.0)      | 125          | 138.7 (114.4-162.9)      | 218                | 245.3 (212.8-277.9)      | 260.4 (249.9-270.9)      |
| Total                   | 380,422            | 350.5 (349.4-351.6)      | 44,011             | 265.5 (263.1-268.0)      | 38,253       | 163.4 (161.7-165.0)      | 25,261             | 208.1 (205.6-210.6)      | 303.4 (302.6-304.3)      |

<sup>a</sup> “Other” category includes Asians, Native Americans, Native Hawaiians, Pacific Islanders, and multiple races.

**eTable 6.** 2010 MS Prevalence per 100,000 Adults in the US, Cumulated over 10 Years, for the Medicare Dataset

| Sex & Age (yrs.) groups | Non-Hispanic-White |                              | Non-Hispanic-Black |                              | Hispanic     |                              | Other <sup>a</sup> |                              | Total                        |
|-------------------------|--------------------|------------------------------|--------------------|------------------------------|--------------|------------------------------|--------------------|------------------------------|------------------------------|
|                         | No. of Cases       | 2010 Prevalence (95% CI)     | No. of Cases       | 2010 Prevalence (95% CI)     | No. of Cases | 2010 Prevalence (95% CI)     | No. of Cases       | 2010 Prevalence (95% CI)     | 2010 Prevalence (95% CI)     |
| Female                  | 118,927            | 591.4<br>(588.0-594.7)       | 19,305             | 704.0<br>(694.0-713.9)       | 6,836        | 338.0<br>(330.0-346.0)       | 3,202              | 257.3<br>(248.4-266.2)       | 567.7<br>(564.8-570.5)       |
| Male                    | 36,632             | 271.3<br>(268.5-274.0)       | 4,490              | 258.5<br>(250.0-265.0)       | 2,906        | 188.4<br>(181.6-195.2)       | 1,218              | 155.1<br>(127.5-195.2)       | 255.7<br>(253.4-258.0)       |
| 18-35                   | 5,638              | 1,156.8<br>(1,126.8-1,286.8) | 2,611              | 1,119.8<br>(1,077.1-1,162.5) | 2,060        | 1,045.0<br>(1,000.1-1,089.8) | 510                | 779.1<br>(711.8-845.5)       | 1,100.4<br>(1,079.8-1,121.0) |
| 35-44                   | 15,664             | 2,398.3<br>(2,361.2-2,435.5) | 4,392              | 2,086.2<br>(2,025.1-2,147.2) | 2,436        | 1,546.0<br>(1,485.1-1,607.0) | 695                | 1,161.7<br>(1,075.8-1,247.5) | 2,145.0<br>(2,117.6-2,172.3) |
| 45-54                   | 36,257             | 2,537.0<br>(2,511.1-2,562.7) | 6,709              | 1,586.2<br>(1,485.1-1,624.5) | 2,286        | 902.5<br>(856.6-939.3)       | 1,156              | 1,054.8<br>(994.3-1,115.3)   | 2,095.3<br>(2,076.4-2,114.1) |
| 55-64                   | 38,115             | 1678.1<br>(1,661.4-1,694.8)  | 5,756              | 934.4<br>(910.3-958.4)       | 1,643        | 433.1<br>(412.3-453.9)       | 1,283              | 782.8<br>(741.8-823.9)       | 1,351.3<br>(1,349.1-1,373.6) |
| 65+                     | 5,9884             | 208.1<br>(206.5-209.8)       | 4,329              | 144.1<br>(139.8-148.4)       | 1,308        | 50.8<br>(48.0-53.5)          | 675                | 38.9<br>(38.9-41.8)          | 183.4<br>(182.0-184.8)       |
| Total                   | 155,578            | 462.8<br>(460.5-465.1)       | 23,796             | 530.4<br>(523.7-537.2)       | 9,742        | 273.3<br>(267.8-278.7)       | 4,419              | 206.0<br>(199.9-212.0)       | 441.7<br>(439.7-443.7)       |

<sup>a</sup> “Other” category includes Asians, Native Americans, Native Hawaiians, Pacific Islanders, and multiple races
