# Supplementary material for: Population-Based Estimates for the Prevalence of Multiple Sclerosis in the United States by Race, Ethnicity, Age, Sex, and Geographic Region
Source: PubMed Central journal article supplement (PMC10186207; doi:10.1001/jamaneurol.2023.1135), 2023-05-15
Supplement: jamaneurol-e231135-s002.pdf [file jamaneurol-e231135-s002.pdf]

## Data Sharing Statement

Hittle. Population-Based Estimates for the Prevalence of Multiple Sclerosis in the United States by Race, Ethnicity, Age, Sex, and Geographic Region. *JAMA Neurol.* Published May 15, 2023. doi:10.1001/jamaneurol.2023.1135

### Data

**Data available:** Yes

**Data types:** Deidentified participant data, Other (please specify)

**Additional Information:** De-identified epidemiological data will be made available at the level of US states.

**How to access data:** website

**When available:** beginning date: 01-01-2024

### Supporting Documents

**Document types:** None

### Additional Information

**Who can access the data:** Per request from researchers who proposed use of data has been approved

**Types of analyses:** Data analysis using prevalence of multiple sclerosis

**Mechanisms of data availability:** After approval of a proposal
